# Supplementary material for: The smallest superatom Au4(PPh3)4I2 with two free electrons: synthesis, structure analysis, and electrocatalytic conversion of CO2 to CO
Source: Royal Society of Chemistry journal article supplement (doi:10.1039/d3na00191a), 2023-01-01
Supplement: d3na00191a1.pdf [file d3na00191a1.pdf]

Supplementary Information for

**The Smallest Superatom Au<sub>4</sub>(PPh<sub>3</sub>)<sub>4</sub>I<sub>2</sub> with Two Free  
Electrons: Synthesis, Structure Analysis, and  
Electrocatalytic Conversion of CO<sub>2</sub> to CO**

Cheng Zhang,<sup>a</sup> Mei Ding,<sup>a</sup> Yonggang Ren,<sup>a</sup> Along Ma,<sup>a</sup> Zhengmao Yin,<sup>\*a</sup> Xiaoshuang Ma<sup>\*a</sup> and  
Shuxin Wang<sup>\*a</sup>

<sup>a</sup>College of Materials Science and Engineering, Qingdao University of Science and  
Technology, Qingdao 266042 (P. R. China). Correspondence and requests for materials  
should be addressed to Z.Y. (Email: [yzm198752@163.com](mailto:yzm198752@163.com)) or to X.M. (Email:  
[xiaoshuang\\_ma@qust.edu.cn](mailto:xiaoshuang_ma@qust.edu.cn)) or to S.W. (Email: [shuxin\\_wang@qust.edu.cn](mailto:shuxin_wang@qust.edu.cn)).

## Table of Contents

### Supplementary Figures

- Fig. S1.** UV-vis absorbance spectra of **Au<sub>4</sub>** and **Au<sub>11</sub>** in CH<sub>2</sub>Cl<sub>2</sub> for one week at room temperature.
- Fig. S2.** Packing mode of **Au<sub>4</sub>** in the crystal shown along a, b and c axis.
- Fig. S3.** The Au-Au bond lengths in **Au<sub>4</sub>** and **Au<sub>11</sub>**.
- Fig. S4.** Packing mode of **Au<sub>11</sub>** in the crystal shown along a, b and c axis.
- Fig. S5.** CV of **Au(I)P**, **Au<sub>4</sub>** and **Au<sub>11</sub>** at a scan rate from 0.02 to 0.1 V·s<sup>-1</sup>.
- Fig. S6.** Three kind of Au-Au bond lengths in the **Au<sub>4</sub>**.
- Fig. S7.** UV-vis absorbance spectra of **Au<sub>4</sub>** and **Au<sub>11</sub>** before and after eCO<sub>2</sub>RR.

### Supplementary Tables

- Table S1.** The crystal structure parameters for Au<sub>4</sub>(PPh<sub>3</sub>)<sub>4</sub>I<sub>2</sub>.
- Table S2.** Average bond length of **Au<sub>4</sub>** and **Au<sub>11</sub>**.

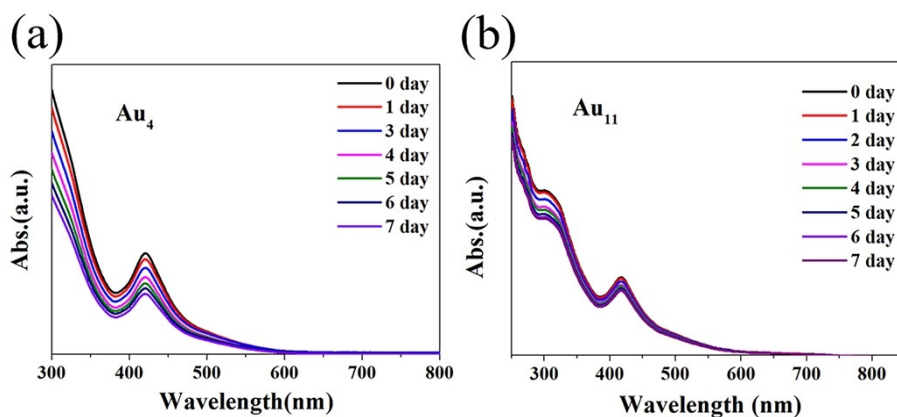

**Fig S1.** UV-vis absorbance spectra of (a)  $\text{Au}_4$  and (b)  $\text{Au}_{11}$  in  $\text{CH}_2\text{Cl}_2$  for one week at room temperature

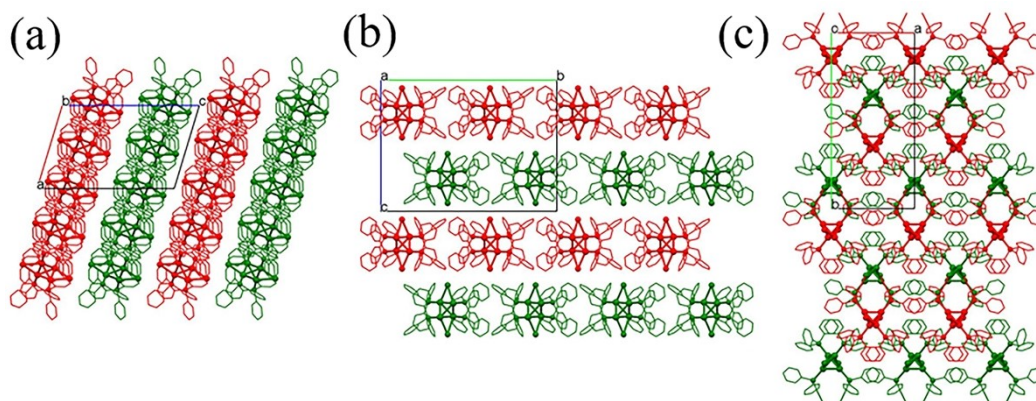

**Fig S2.** Packing mode of  $\text{Au}_4$  in the crystal shown along an axis (a), b axis (b) and c axis (c). The two enantiomers are shown in different colors.

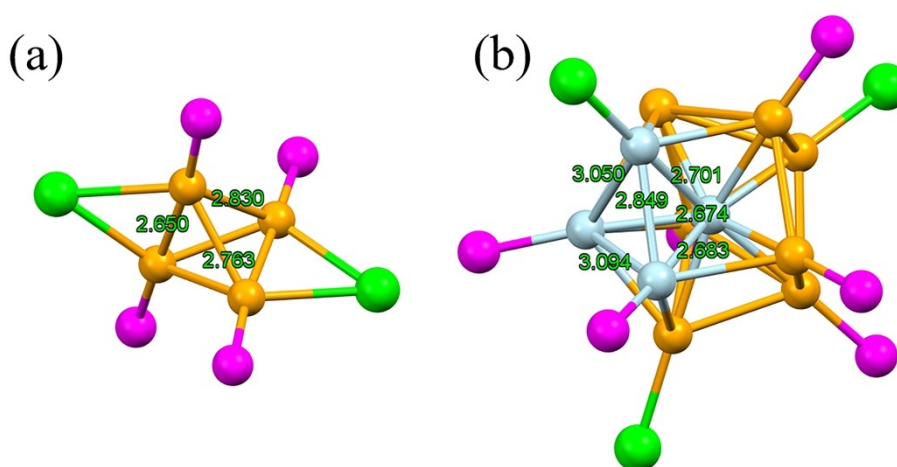

**Fig S3.** The Au-Au bond lengths in the (a)  $\text{Au}_4$  and (b)  $\text{Au}_{11}$ . (Color labels: yellow and light blue = Au, pink = P, green = I, for charity all C and H atoms are not shown.)

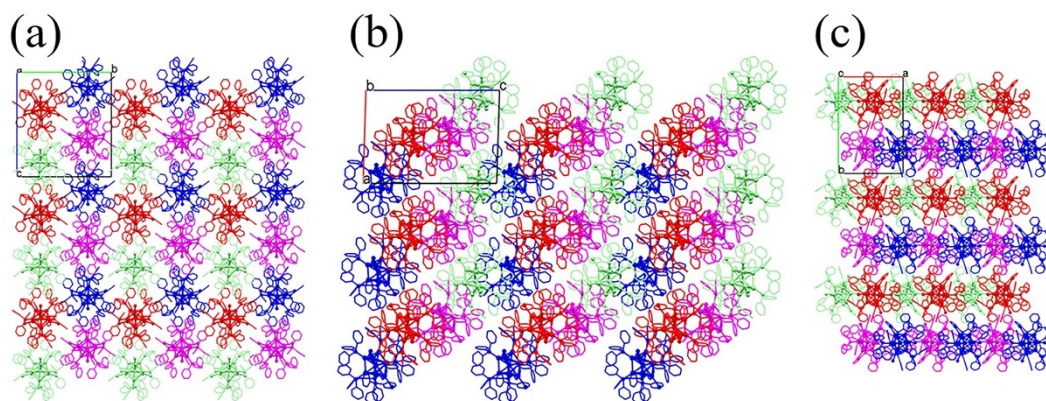

**Fig S4.** Packing mode of Au<sub>11</sub> in the crystal shown along an axis (a), b axis (b) and c axis (c). The three enantiomers are shown in different colors.

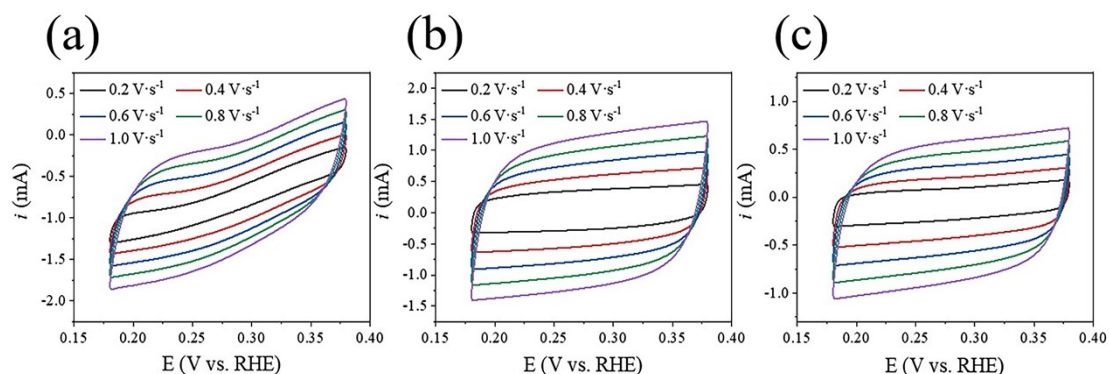

**Fig S5.** Cyclic voltammetry of (a) Au(IP), (b) Au<sub>4</sub> and (c) Au<sub>11</sub> in 0.5 M KHCO<sub>3</sub> electrolyte at a scan rate from 0.02 (black), 0.04 (red), 0.06 (blue), 0.08 (green), 0.1 (purple) V·s<sup>-1</sup>.

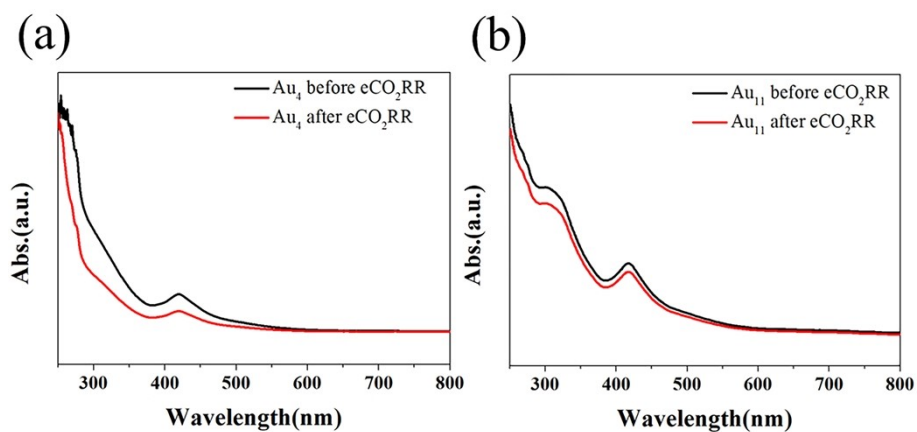

**Fig S6.** UV-vis absorbance spectra of Au<sub>4</sub> and Au<sub>11</sub> before and after eCO<sub>2</sub>RR.

**Table S1.** The crystal structure parameters for Au<sub>4</sub>(PPh<sub>3</sub>)<sub>4</sub>I<sub>2</sub>.

|                                             |                                                                               |
|---------------------------------------------|-------------------------------------------------------------------------------|
| Identification code                         | Au <sub>4</sub> (PPh <sub>3</sub> ) <sub>4</sub> I <sub>2</sub>               |
| Empirical formula                           | C <sub>72</sub> H <sub>60</sub> Au <sub>4</sub> I <sub>2</sub> P <sub>4</sub> |
| Formula weight                              | 2090.74                                                                       |
| Temperature/K                               | 149.99(10)                                                                    |
| Crystal system                              | Monoclinic                                                                    |
| Space group                                 | C2/c                                                                          |
| a/Å                                         | 12.8328(6)                                                                    |
| b/Å                                         | 25.9977(10)                                                                   |
| c/Å                                         | 20.2930(9)                                                                    |
| α/°                                         | 90                                                                            |
| β/°                                         | 106.861(4)                                                                    |
| γ/°                                         | 90                                                                            |
| Volume/Å <sup>3</sup>                       | 6479.1(5)                                                                     |
| Z                                           | 4                                                                             |
| ρ <sub>calc</sub> /cm <sup>3</sup>          | 2.143                                                                         |
| μ/mm <sup>-1</sup>                          | 10.123                                                                        |
| F(000)                                      | 3896.0                                                                        |
| Crystal size/mm <sup>3</sup>                | 0.06 × 0.05 × 0.05                                                            |
| Radiation                                   | Mo Kα (λ = 0.71073)                                                           |
| 2θ range for data collection/°              | 4.194 to 62.482                                                               |
| Index ranges                                | -15 ≤ h ≤ 17, -37 ≤ k ≤ 28, -25 ≤ l ≤ 22                                      |
| Reflections collected                       | 18072                                                                         |
| Independent reflections                     | 7931 [R <sub>int</sub> = 0.0456, R <sub>sigma</sub> = 0.0630]                 |
| Data/restraints/parameters                  | 7931/0/298                                                                    |
| Goodness-of-fit on F <sup>2</sup>           | 1.038                                                                         |
| Final R indexes [I ≥ 2σ (I)]                | R <sub>1</sub> = 0.0364, wR <sub>2</sub> = 0.0733                             |
| Final R indexes [all data]                  | R <sub>1</sub> = 0.0539, wR <sub>2</sub> = 0.0781                             |
| Largest diff. peak/hole / e Å <sup>-3</sup> | 2.27/-1.25                                                                    |

**Table S2.** Average bond length of Au<sub>4</sub> and Au<sub>11</sub>.

| Clusters               | Au-Au (Å) | Au-P (Å) | Au-I (Å) |
|------------------------|-----------|----------|----------|
| <b>Au<sub>4</sub></b>  | 2.740     | 2.287    | 2.935    |
| <b>Au<sub>11</sub></b> | 2.875     | 2.282    | 2.600    |
